# Supplementary material for: Systematic characterization of site-specific proline hydroxylation using hydrophilic interaction chromatography and mass spectrometry
Source: eLife journal article supplement (doi:10.7554/elife.108128), 2025-08-22
Supplement: fig8-figsupp1-data1 [file Actin-HIF1A-labeled.pdf › Figure 8-figure supplement 1-source data 1/Actin-HIF1A-labeled.pdf]

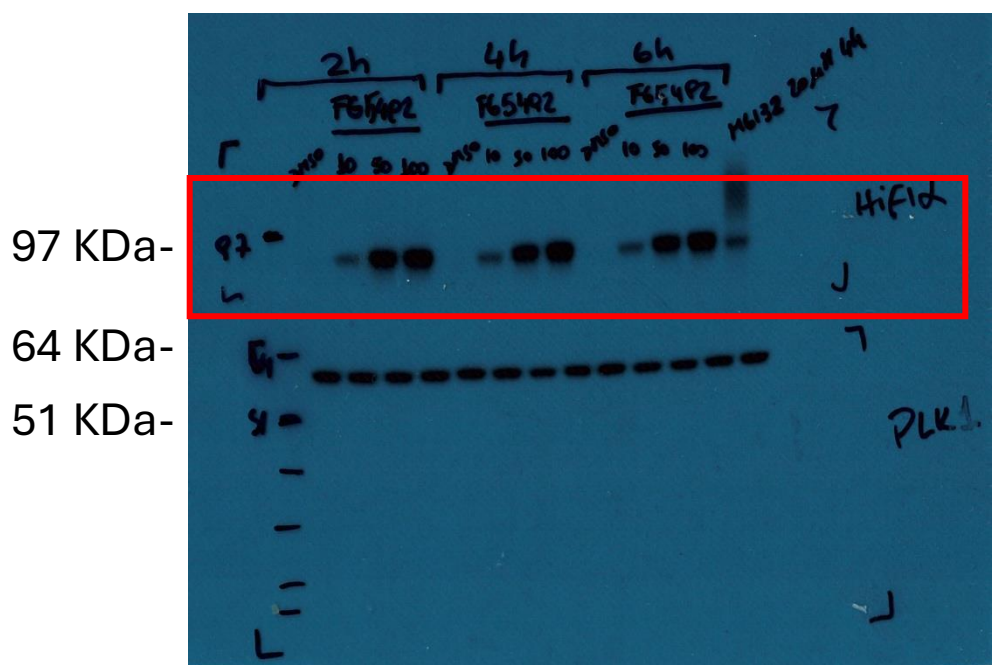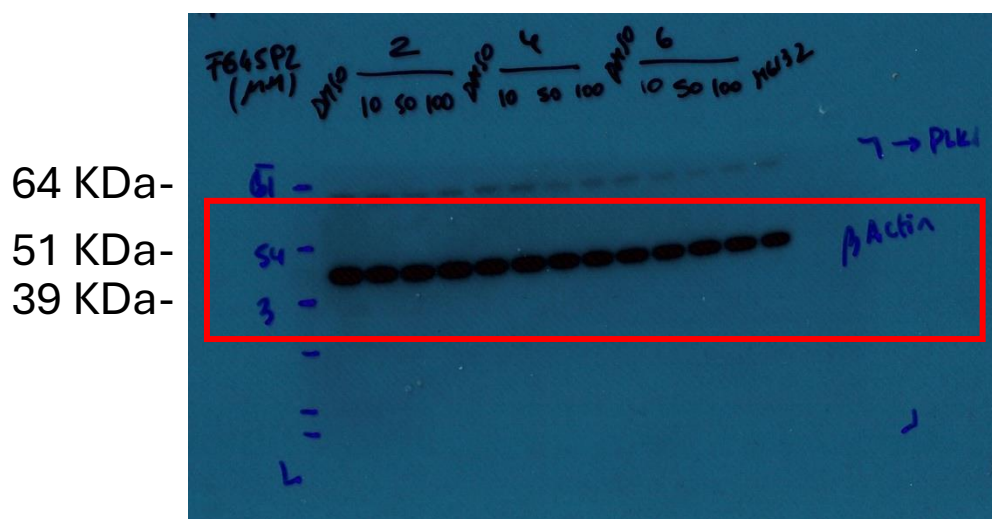

Figure 8-figure supplement 1-source data 1: Original membranes of western blots showing bands including actin and HIF1 $\alpha$  (highlighted).
