# Supplementary material for: Systematic characterization of site-specific proline hydroxylation using hydrophilic interaction chromatography and mass spectrometry
Source: eLife journal article supplement (doi:10.7554/elife.108128), 2025-08-22
Supplement: fig9-data1 [file P564OH-HIF1A-labeled.pdf › Figure 9-source data 1/P564OH-HIF1A-labeled.pdf]

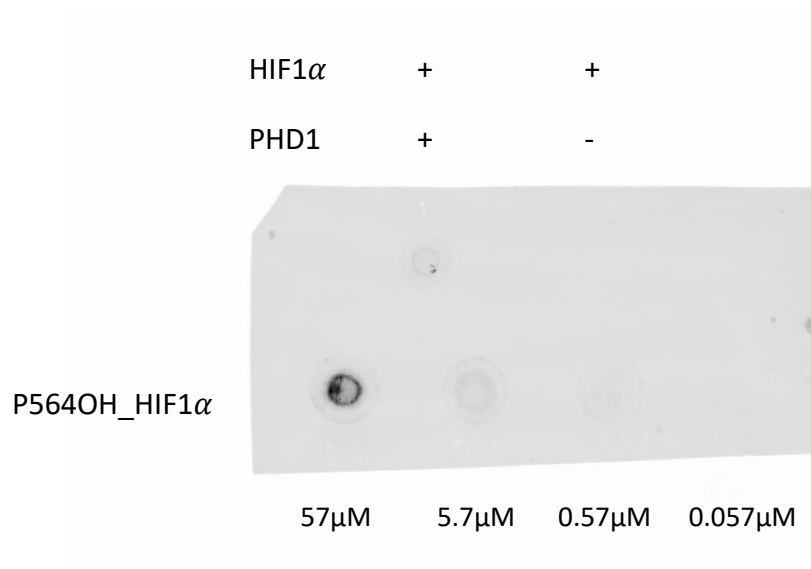

Figure 9-source data 1: Original membranes of dot plots corresponding to Figure 9, panel C, showing conditions with or without PHD1, and different starting amount of synthetic peptides from HIF1 $\alpha$ .
